# Supplementary material for: A compromised specific humoral immune response against the SARS-CoV-2 receptor-binding domain is related to viral persistence and periodic shedding in the gastrointestinal tract
Source: Springer Nature journal article supplement (doi:10.1038/s41423-020-00550-2), 2020-10-09

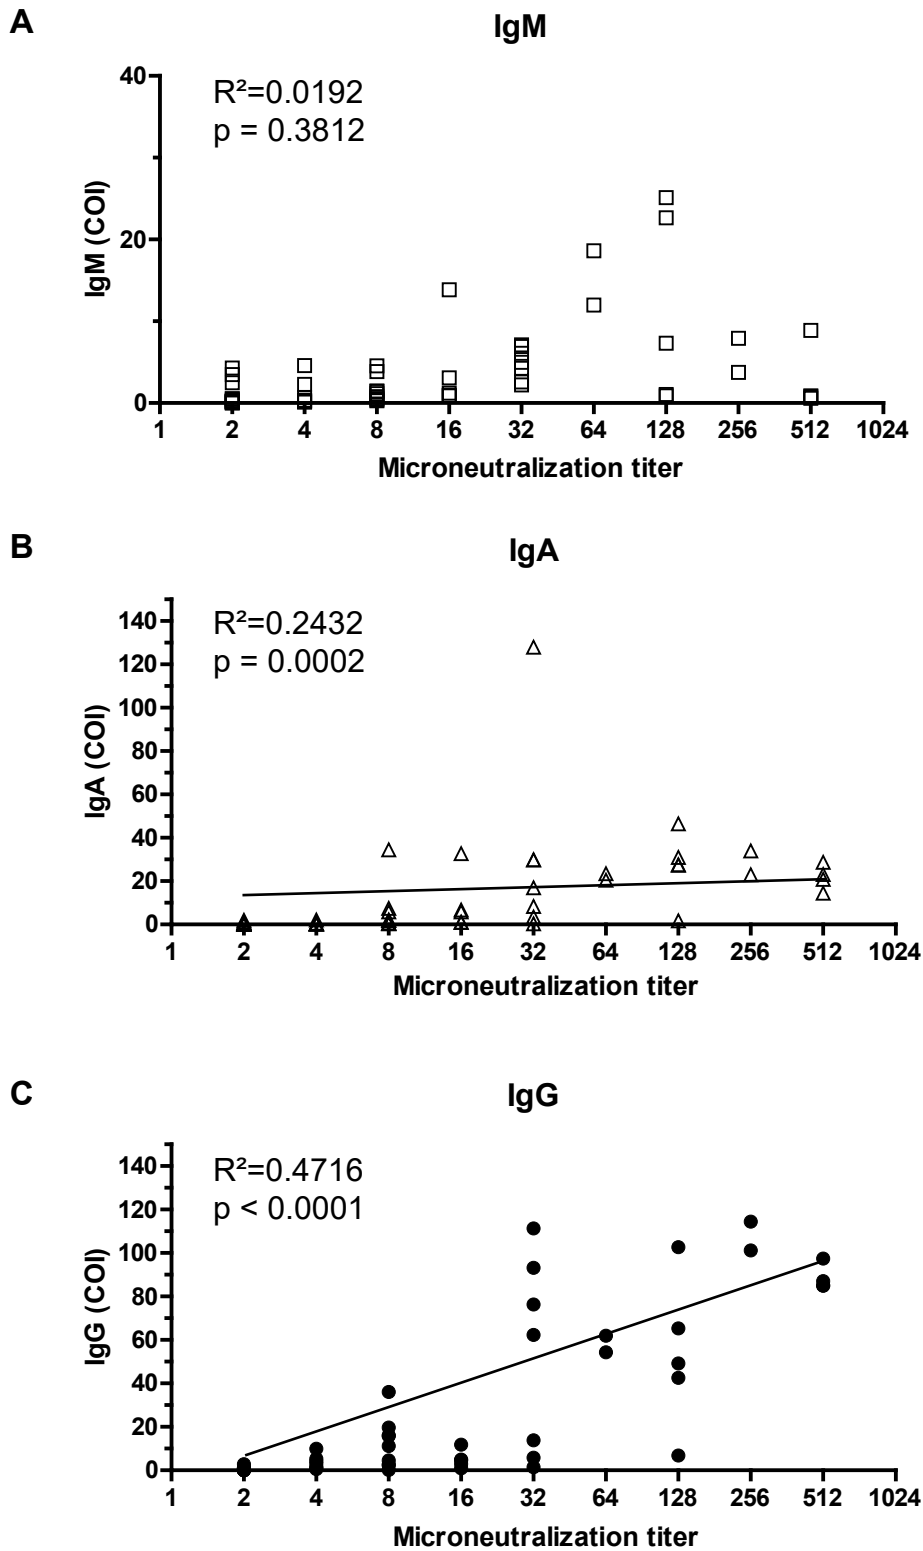

Supplement: 41423_2020_550_MOESM6_ESM.pdf [file 41423_2020_550_MOESM6_ESM.pdf]
